# Supplementary material
Source: PubMed Central journal article supplement (PMC4755446)
Supplement: supp_dev344_dev344supp_table1.pdf [file supp_dev344_dev344supp_table1.pdf]

**Supplementary Table S1 Association between dairy intake and ovarian stimulation outcomes from the EARTH Study.<sup>a</sup>**

| Dairy intake (range, servings/day)  | Endometrial thickness (mm) | Peak E2 level (ng/dL) | Oocyte total yield (n) | MII oocyte yield (n) |
|-------------------------------------|----------------------------|-----------------------|------------------------|----------------------|
| Adjusted mean (95% CI) <sup>b</sup> |                            |                       |                        |                      |
| Total dairy                         |                            |                       |                        |                      |
| < 1.34                              | 10.0 (9.4, 10.6)           | 2074 (1853, 2295)     | 10.5 (9.3, 11.8)       | 8.9 (7.9, 10.0)      |
| 1.38–1.94                           | 10.6 (10.0, 11.1)          | 2170 (1957, 2383)     | 11.6 (10.3, 13.0)      | 9.6 (8.5, 10.7)      |
| 1.96–2.97                           | 10.1 (9.5, 10.7)           | 2282 (2077, 2486)     | 11.1 (10.0, 12.5)      | 9.9 (8.9, 11.1)      |
| 3.02–6.15                           | 10.2 (9.6, 10.8)           | 1880 (1676, 2084)     | 9.9 (8.9, 11.2)        | 8.5 (7.5, 9.5)       |
| P-trend <sup>c</sup>                | 0.91                       | 0.11                  | 0.30                   | 0.38                 |
| Full-fat dairy <sup>d</sup>         |                            |                       |                        |                      |
| < 0.59                              | 10.5 (9.9, 11.1)           | 2069 (1840, 2297)     | 11.4 (10.0, 12.9)      | 9.6 (8.5, 10.9)      |
| 0.61–0.98                           | 10.0 (9.5, 10.6)           | 2217 (2002, 2433)     | 11.1 (9.9, 12.5)       | 9.4 (8.4, 10.6)      |
| 1.00–1.59                           | 10.2 (9.6, 10.8)           | 2025 (1812, 2239)     | 10.3 (9.1, 11.5)       | 9.0 (8.0, 10.2)      |
| 1.61–4.24                           | 10.1 (9.5, 10.7)           | 2081 (1871, 2290)     | 10.5 (9.3, 11.8)       | 8.8 (7.9, 9.9)       |
| P-trend                             | 0.59                       | 0.82                  | 0.36                   | 0.34                 |
| Low-fat dairy <sup>e</sup>          |                            |                       |                        |                      |
| < 0.47                              | 10.2 (9.6, 10.7)           | 2130 (1925, 2335)     | 10.1 (9.0, 11.3)       | 8.5 (7.6, 9.5)       |
| 0.48–0.89                           | 10.0 (9.4, 10.7)           | 2192 (1958, 2427)     | 11.7 (10.3, 13.3)      | 10.0 (8.8, 11.3)     |
| 0.90–1.18                           | 10.2 (9.6, 10.7)           | 2145 (1950, 2339)     | 11.1 (9.9, 12.3)       | 9.4 (8.5, 10.5)      |
| 1.20–5.30                           | 10.5 (9.9, 11.0)           | 1925 (1712, 2138)     | 10.4 (9.2, 11.7)       | 9.0 (8.0, 10.1)      |
| P-trend                             | 0.46                       | 0.19                  | 0.80                   | 0.59                 |

Sample size for each outcome: endometrial thickness  $n = 210$  women with 321 cycles; Peak E2 level  $n = 199$  women with 288 cycles; oocyte total yield and MII oocyte yield  $n = 201$  women with 288 cycles.

E2, estradiol; MII, mature oocytes.

<sup>a</sup>All analyses were run using generalized linear mixed models with random intercepts, linear (for Peak E2) or Poisson (for oocyte counts) distribution, identity (for endometrial thickness and Peak E2) or log (for oocyte counts) link function and compound symmetry correlation structure.

<sup>b</sup>Data are presented as predicted marginal means adjusted for total calorie intake, age, BMI, race, smoking status, infertility diagnosis, protocol type, alcohol intake and dietary patterns using the LSMEANS procedure.

<sup>c</sup>Test for trend were performed using the median level of dairy in each quartile as a continuous variable in the model.

<sup>d</sup>Adjusted for footnote 'b' and low-fat dairy.

<sup>e</sup>Adjusted for footnote 'b' and full-fat dairy.
