# Supplementary material
Source: PubMed Central journal article supplement (PMC4755446)
Supplement: supp_dev344_dev344supp_table2.pdf [file supp_dev344_dev344supp_table2.pdf]

**Supplementary Table SII Association between dairy intake and fertilization rates in 222 women (288 fresh cycles) from the EARTH Study.<sup>a</sup>**

|                             | Fertilization rate, all cycles      | Fertilization rate, IVF cycles | Fertilization rate, ICSI cycles |
|-----------------------------|-------------------------------------|--------------------------------|---------------------------------|
|                             | Adjusted mean (95% CI) <sup>b</sup> |                                |                                 |
| Total dairy                 |                                     |                                |                                 |
| <1.34                       | 0.73 (0.67, 0.78)                   | 0.69 (0.58, 0.78)              | 0.76 (0.67, 0.83)               |
| 1.38–1.94                   | 0.73 (0.67, 0.79)                   | 0.71 (0.59, 0.80)              | 0.74 (0.66, 0.82)               |
| 1.96–2.97                   | 0.66 (0.60, 0.72)                   | 0.66 (0.55, 0.75)              | 0.66 (0.57, 0.74)               |
| 3.02–6.15                   | 0.75 (0.69, 0.80)                   | 0.76 (0.66, 0.84)              | 0.74 (0.66, 0.81)               |
| P-trend <sup>c</sup>        | 0.70                                | 0.34                           | 0.81                            |
| Full-fat dairy <sup>d</sup> |                                     |                                |                                 |
| <0.59                       | 0.71 (0.64, 0.77)                   | 0.70 (0.59, 0.79)              | 0.74 (0.63, 0.82)               |
| 0.61–0.98                   | 0.69 (0.62, 0.74)                   | 0.65 (0.54, 0.75)              | 0.71 (0.62, 0.79)               |
| 1.00–1.59                   | 0.77 (0.71, 0.82)                   | 0.76 (0.66, 0.85)              | 0.77 (0.68, 0.83)               |
| 1.61–4.24                   | 0.71 (0.65, 0.77)                   | 0.70 (0.58, 0.79)              | 0.72 (0.64, 0.80)               |
| P-trend                     | 0.83                                | 0.85                           | 0.87                            |
| Low-fat dairy <sup>e</sup>  |                                     |                                |                                 |
| <0.47                       | 0.70 (0.64, 0.76)                   | 0.69 (0.59, 0.78)              | 0.70 (0.61, 0.78)               |
| 0.48–0.89                   | 0.74 (0.67, 0.79)                   | 0.68 (0.55, 0.78)              | 0.79 (0.71, 0.86)               |
| 0.90–1.18                   | 0.72 (0.66, 0.77)                   | 0.73 (0.63, 0.81)              | 0.71 (0.62, 0.78)               |
| 1.20–5.30                   | 0.72 (0.66, 0.78)                   | 0.72 (0.62, 0.80)              | 0.73 (0.64, 0.81)               |
| P-trend                     | 0.73                                | 0.57                           | 0.85                            |

ICSI, intra-cytoplasmic sperm injection; IVF, *in vitro* fertilization.

<sup>a</sup>All analyses were run using generalized linear mixed models with random intercepts, binomial distribution, logit link function and compound symmetry correlation structure. A total of 105 women contributed 133 IVF cycles and 110 women contributed 155 ICSI cycles.

<sup>b</sup>Data are presented as predicted marginal means adjusted for total calorie intake, age, BMI, race, smoking status, infertility diagnosis, protocol type, alcohol intake and dietary patterns using the LSMEANS procedure.

<sup>c</sup>Test for trend were performed using the median level of dairy in each quartile as a continuous variable in the model.

<sup>d</sup>Adjusted for footnote 'b' and low-fat dairy.

<sup>e</sup>Adjusted for footnote 'b' and full-fat dairy.
