# Supplementary material
Source: PubMed Central journal article supplement (PMC4755446)
Supplement: supp_dev344_dev344supp_table3.pdf [file supp_dev344_dev344supp_table3.pdf]

**Supplementary Table SIII Association between dairy intake and embryo quality in 215 women (305 fresh cycles) from the EARTH Study.<sup>a</sup>**

|                             | Poor quality embryos (%)            | Accelerated embryo cleavage (%) | Slow embryo cleavage (%) | % With ≥ 1 best quality embryo on Days 2 and 3 |
|-----------------------------|-------------------------------------|---------------------------------|--------------------------|------------------------------------------------|
|                             | Adjusted mean (95% CI) <sup>b</sup> |                                 |                          |                                                |
| Total dairy                 |                                     |                                 |                          |                                                |
| < 1.34                      | 15.9 (10.7, 23.1)                   | 6.8 (4.3, 10.5)                 | 27.5 (20.4, 35.9)        | 62.3 (47.6, 75.1)                              |
| 1.38–1.94                   | 13.1 (8.7, 19.3)                    | 6.4 (4.1, 9.9)                  | 24.7 (18.3, 32.5)        | 68.1 (53.6, 79.7)                              |
| 1.96–2.97                   | 18.1 (12.6, 25.3)                   | 4.1 (2.4, 6.9)                  | 31.0 (23.7, 39.3)        | 57.7 (43.9, 70.4)                              |
| 3.02–6.15                   | 15.2 (10.5, 21.6)                   | 8.8 (6.0, 12.9)                 | 28.2 (21.5, 36.1)        | 51.2 (37.7, 64.5)                              |
| P-trend <sup>c</sup>        | 0.83                                | 0.21                            | 0.77                     | 0.17                                           |
| Full-fat dairy <sup>d</sup> |                                     |                                 |                          |                                                |
| < 0.59                      | 14.9 (9.7, 22.3)                    | 6.7 (4.1, 10.7)                 | 26.5 (19.4, 35.1)        | 62.7 (47.7, 75.7)                              |
| 0.61–0.98                   | 14.0 (9.4, 20.5)                    | 6.8 (4.3, 10.5)                 | 27.8 (20.9, 36.0)        | 56.2 (41.8, 69.6)                              |
| 1.00–1.59                   | 16.0 (10.9, 22.9)                   | 4.4 (2.6, 7.4)                  | 28.4 (21.5, 36.5)        | 58.6 (44.5, 71.5)                              |
| 1.61–4.24                   | 15.9 (10.9, 22.7)                   | 7.7 (5.0, 11.6)                 | 27.3 (20.6, 35.3)        | 59.3 (45.3, 72.0)                              |
| P-trend                     | 0.69                                | 0.52                            | 0.97                     | 0.90                                           |
| Low-fat dairy <sup>e</sup>  |                                     |                                 |                          |                                                |
| < 0.47                      | 13.8 (9.3, 20.0)                    | 6.9 (4.4, 10.6)                 | 28.2 (21.4, 36.1)        | 63.2 (49.5, 75.0)                              |
| 0.48–0.89                   | 13.3 (8.5, 20.3)                    | 5.1 (2.9, 8.8)                  | 22.0 (15.6, 30.2)        | 56.7 (41.4, 70.8)                              |
| 0.90–1.18                   | 18.5 (13.2, 25.2)                   | 6.4 (4.2, 9.7)                  | 27.1 (20.9, 34.3)        | 61.7 (48.9, 73.1)                              |
| 1.20–5.30                   | 15.8 (10.7, 22.6)                   | 6.7 (4.3, 10.5)                 | 33.5 (25.8, 42.2)        | 55.2 (41.3, 68.3)                              |
| P-trend                     | 0.40                                | 0.78                            | 0.31                     | 0.51                                           |

<sup>a</sup>All analyses were run using generalized linear mixed models with random intercepts, binomial distribution, logit link function and compound symmetry correlation structure.

<sup>b</sup>Data are presented as predicted marginal means adjusted for total calorie intake, age, BMI, race, smoking status, infertility diagnosis, protocol type, alcohol intake and dietary patterns using the LSMEANS procedure.

<sup>c</sup>Test for trend were performed using the median level of dairy in each quartile as a continuous variable in the model.

<sup>d</sup>Adjusted for footnote 'b' and low-fat dairy.

<sup>e</sup>Adjusted for footnote 'b' and full-fat dairy.

\*Indicates a P-value < 0.05 comparing that quartile versus first quartile.
