# Supplementary material
Source: PubMed Central journal article supplement (PMC4755446)
Supplement: supp_dev344_dev344supp_table4.pdf [file supp_dev344_dev344supp_table4.pdf]

**Supplementary Table SIV Association between dairy intake and clinical outcomes per initiated cycle in 232 women (232 cycles) from the EARTH Study<sup>a</sup> restricting to the first cycles.**

|                             | Successful implantation             | Clinical pregnancy | Live birth        |
|-----------------------------|-------------------------------------|--------------------|-------------------|
|                             | Adjusted mean (95% CI) <sup>b</sup> |                    |                   |
| Total dairy                 |                                     |                    |                   |
| <1.34                       | 0.57 (0.42, 0.71)                   | 0.57 (0.42, 0.71)  | 0.39 (0.26, 0.54) |
| 1.38–1.94                   | 0.77 (0.63, 0.86)*                  | 0.65 (0.51, 0.77)  | 0.46 (0.33, 0.60) |
| 1.96–2.97                   | 0.51 (0.37, 0.64)                   | 0.50 (0.37, 0.63)  | 0.40 (0.28, 0.54) |
| 3.02–6.15                   | 0.70 (0.56, 0.81)                   | 0.62 (0.48, 0.75)  | 0.56 (0.42, 0.70) |
| P-trend <sup>c</sup>        | 0.55                                | 0.80               | 0.15              |
| Full-fat dairy <sup>d</sup> |                                     |                    |                   |
| <0.59                       | 0.56 (0.41, 0.70)                   | 0.51 (0.36, 0.66)  | 0.37 (0.24, 0.53) |
| 0.61–0.98                   | 0.71 (0.58, 0.82)                   | 0.67 (0.53, 0.79)  | 0.46 (0.33, 0.60) |
| 1.00–1.59                   | 0.67 (0.52, 0.78)                   | 0.60 (0.46, 0.73)  | 0.47 (0.33, 0.61) |
| 1.61–4.24                   | 0.62 (0.48, 0.75)                   | 0.57 (0.42, 0.7)   | 0.51 (0.37, 0.65) |
| P-trend                     | 0.92                                | 1.00               | 0.28              |
| Low-fat dairy <sup>e</sup>  |                                     |                    |                   |
| <0.47                       | 0.63 (0.49, 0.75)                   | 0.60 (0.46, 0.72)  | 0.44 (0.31, 0.58) |
| 0.48–0.89                   | 0.62 (0.47, 0.74)                   | 0.55 (0.41, 0.69)  | 0.41 (0.28, 0.56) |
| 0.90–1.18                   | 0.56 (0.43, 0.69)                   | 0.49 (0.36, 0.61)  | 0.42 (0.29, 0.55) |
| 1.20–5.30                   | 0.75 (0.60, 0.85)                   | 0.71 (0.57, 0.82)  | 0.53 (0.39, 0.67) |
| P-trend                     | 0.38                                | 0.41               | 0.44              |

<sup>a</sup>All analyses were run using generalized linear mixed models with random intercepts, binomial distribution, logit link function and compound symmetry correlation structure.

<sup>b</sup>Data are presented as predicted marginal means (95% CI) adjusted for total calorie intake, age, BMI, race, smoking status, infertility diagnosis, protocol type, alcohol intake and dietary patterns.

<sup>c</sup>Test for trend were performed using the median level of dairy in each quartile as a continuous variable in the model.

<sup>d</sup>Adjusted for footnote 'b' and low-fat dairy.

<sup>e</sup>Adjusted for footnote 'b' and full-fat dairy.

\*Indicates a *P*-value < 0.05 comparing that quartile versus first quartile.
